# Supplementary material for: Dynamic mechanical analysis of suspended soft bodies via hydraulic force spectroscopy
Source: Royal Society of Chemistry journal article supplement (doi:10.1039/d2sm01173e), 2022-11-08
Supplement: d2sm01173e1.pdf [file d2sm01173e1.pdf]

## Electronic Supplementary Information to: Dynamic Mechanical Analysis of Suspended Soft Bodies via Hydraulic Force Spectroscopy

Massimiliano Berardi,<sup>a,b</sup> Kajangi Gnanachandran,<sup>c</sup> Jieke Jiang,<sup>d</sup> Kevin Bielawski,<sup>b</sup> Claas W. Visser,<sup>d</sup> Małgorzata Lekka,<sup>c</sup> and B. Imran Akca<sup>a</sup>

\* e-mail: massimiliano.berardi@optics11life.com

<sup>a</sup> LaserLab, Department of Physics and Astronomy, VU University, De Boelelaan 1081, 1081HV, Amsterdam, The Netherlands

<sup>b</sup> Optics11, Hettenheuvelweg 37-39, 1101 BM, Amsterdam, The Netherlands.

<sup>c</sup> Department of Biophysical Microstructures, Institute of Nuclear Physics, Polish Academy of Sciences, PL-31342, Kraków, Poland

<sup>d</sup> Engineering Fluid Dynamics group, Department of Thermal and Fluid Engineering, Faculty of Engineering Technology, University of Twente, 7500 AE, Enschede, The Netherlands

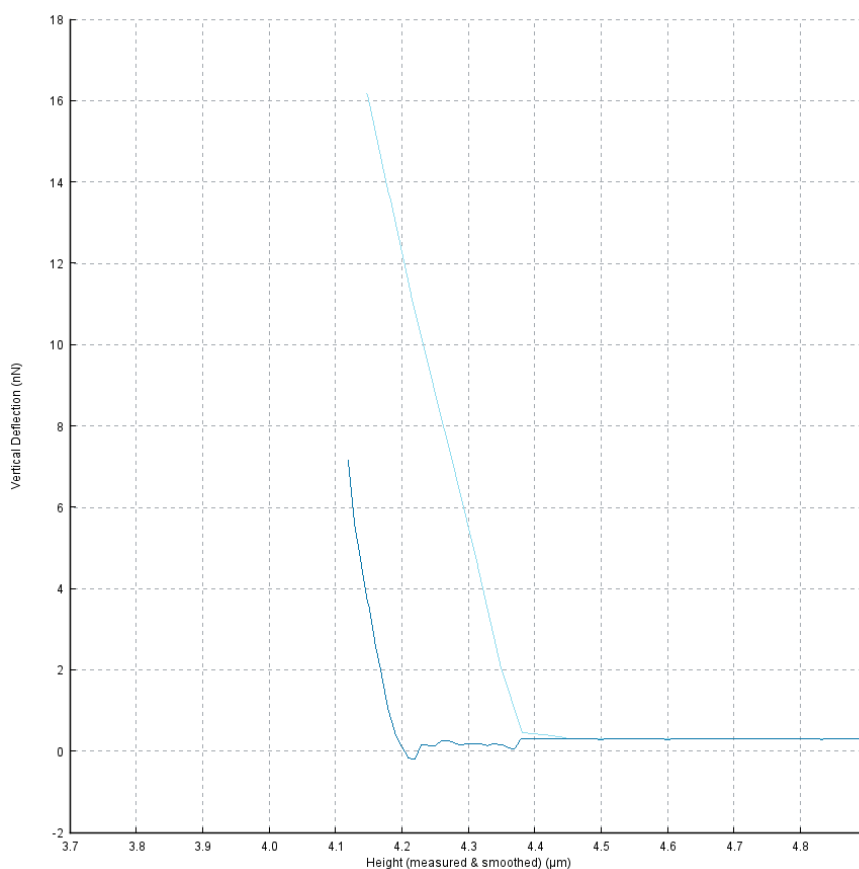

Figure 1 - Example of an experimental AFM curve (spherical probe, 20 µm diameter). The plot shows approach (light blue) and retraction (dark blue) segments, as obtained with the JPK Data Processing software. Stress relaxation and oscillatory rheology segments are not shown. As it is possible to see for the retraction curve, adhesion between sample and AFM tip is very small. In this particular example, the detachment occurs at -450 pN, i.e. approximately 3.1% of the peak load.

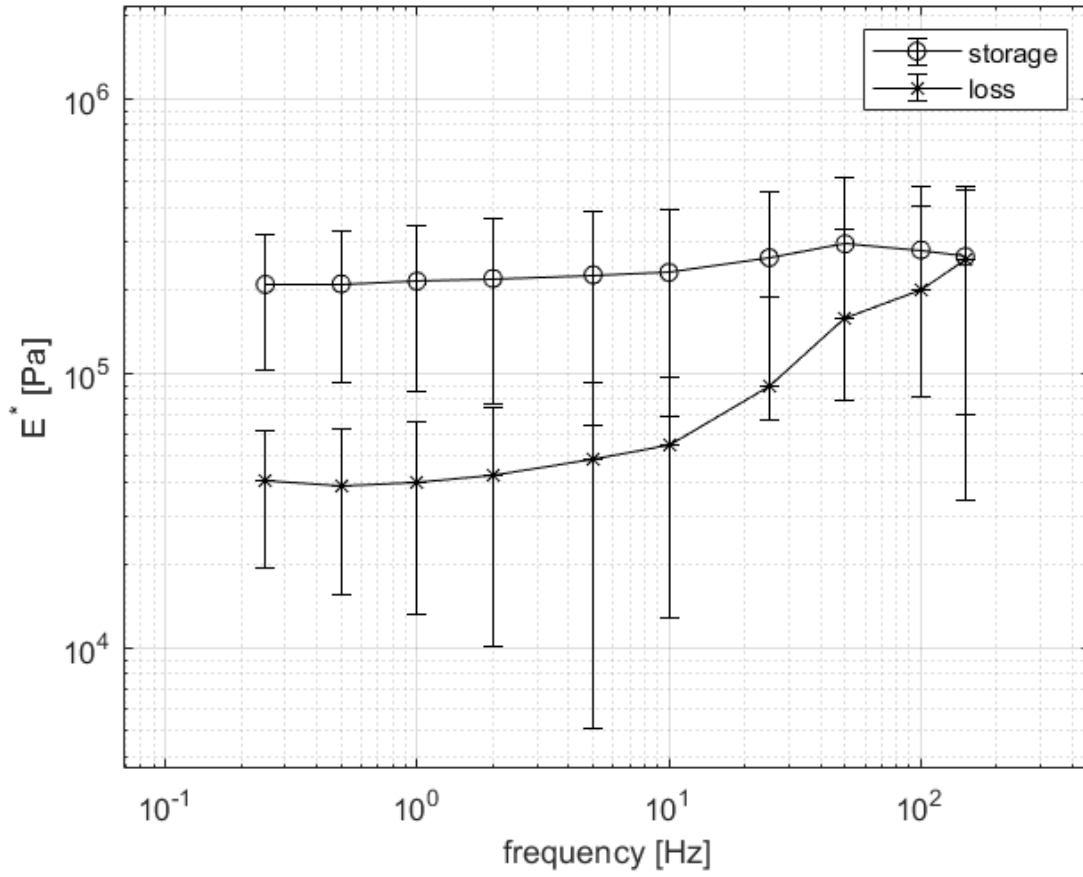

Figure 2 -  $E^*$  obtained via AFM dynamic nanoindentation, using the 3.5  $\mu\text{m}$  diameter tip. The trend of storage and loss moduli is analogous to that observed for HFS and for AFM (20  $\mu\text{m}$  tip). Both curves are shifted towards higher values, but the viscous losses are now in line with what HFS estimates. Results are mean  $\pm$  SD (N=30).
